# Supplementary material for: Epigallocatechin gallate-zinc oxide co-crystalline nanoparticles as an anticancer drug that is non-toxic to normal cells
Source: Royal Society of Chemistry journal article supplement (doi:10.1039/c7ra10997k), 2018-01-01
Supplement: c7ra10997k1.pdf [file c7ra10997k1.pdf]

Supplementary Information for

**Epigallocatechin gallate-zinc oxide co-crystalline nanoparticles as anticancer drug that is non-toxic to normal cells†**

Pawatsanai Samutprasert,<sup>a,b,ψ</sup> Khajeelak Chiablaem,<sup>c,ψ</sup> Chanon Teeraseranee,<sup>d</sup> Punnawich Phaiyarin,<sup>a</sup> Puttikorn Pukfukdee,<sup>a</sup> Prompong Pienpinijtham,<sup>a</sup> Jisnuson Svasti,<sup>c</sup> Tanapat Palaga,<sup>e,f</sup> Kriengsak Lirdprapamongkol,<sup>c,⊥</sup> and Supason Wanichwecharungruang<sup>\*a,f,⊥</sup>

<sup>a</sup> Department of Chemistry, Faculty of Science, Chulalongkorn University. E-mail :  
psupason@chula.ac.th

<sup>b</sup> Center of Excellence on Petrochemical and Materials Technology, Chulalongkorn University, Bangkok 10330, Thailand.

<sup>c</sup> Laboratory of Biochemistry, Chulabhorn Research Institute, Bangkok 10210, Thailand.

<sup>d</sup> Department of Nanoengineering, Faculty of Engineering, Chulalongkorn University.

<sup>e</sup> Department of Microbiology, Faculty of Science, Chulalongkorn University.

<sup>f</sup> Center of Excellence on Materials and Bio-interfaces, Chulalongkorn University, Bangkok 10330, Thailand.

<sup>ψ,⊥</sup> These authors contribute equally.

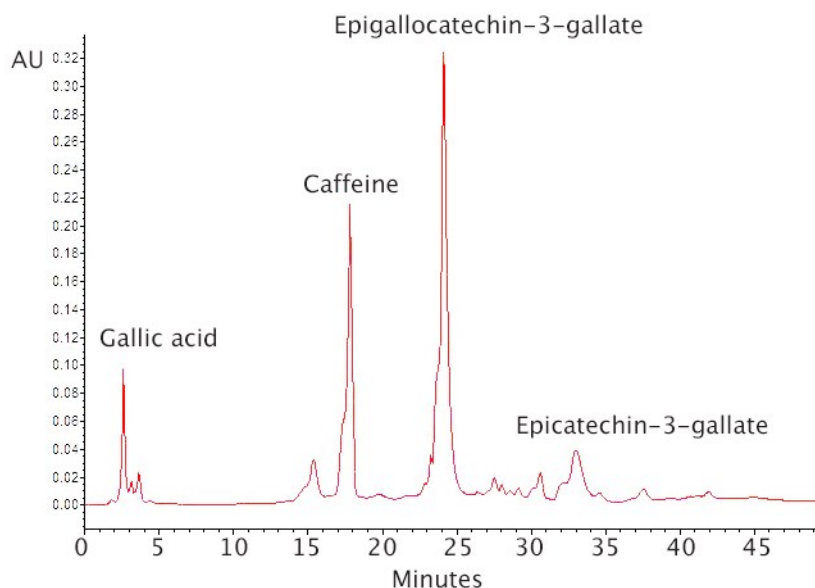

**Figure S1.** Chromatogram of the Oolong tea extract. The assignment of the four peaks is based on retention times of the chromatogram obtained from each standard under the same chromatographic condition.

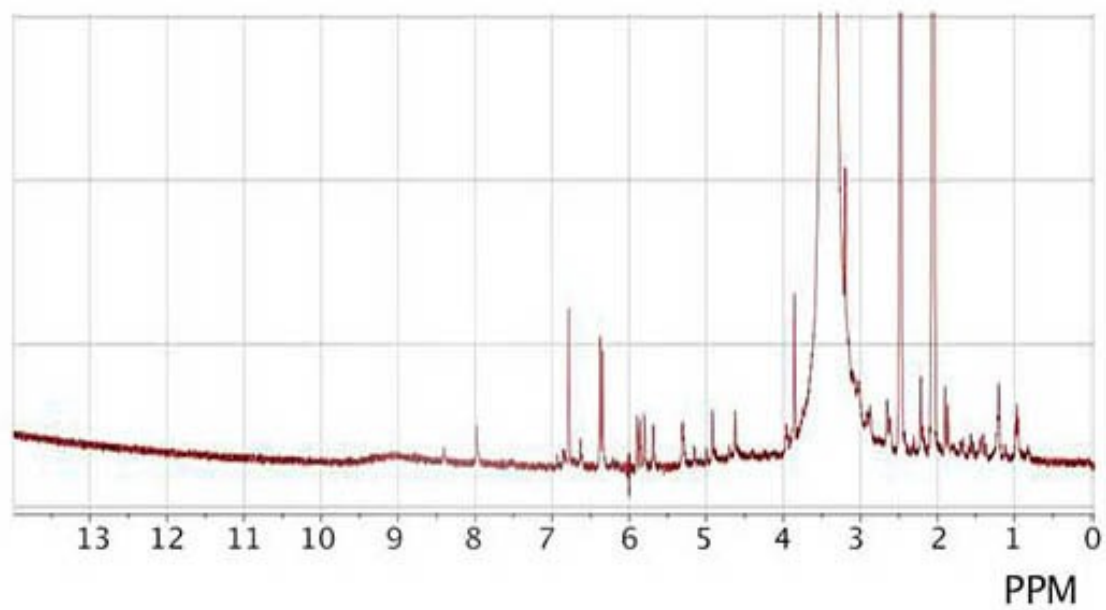

**Figure S2.**  $^1\text{H}$  NMR spectrum of extracted epigallocatechin-3-gallate.

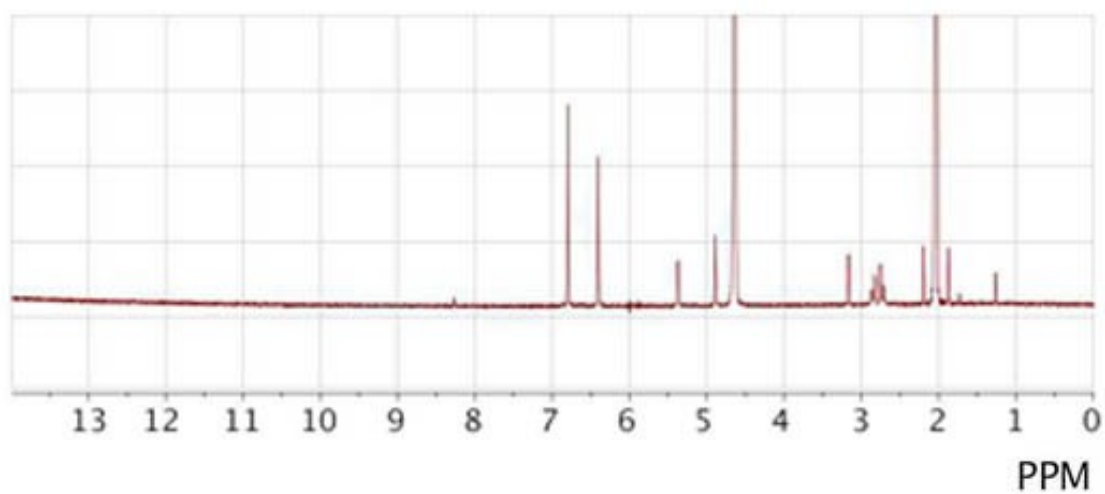

**Figure S3.**  $^1\text{H}$  NMR spectrum of standard epigallocatechin-3-gallate.

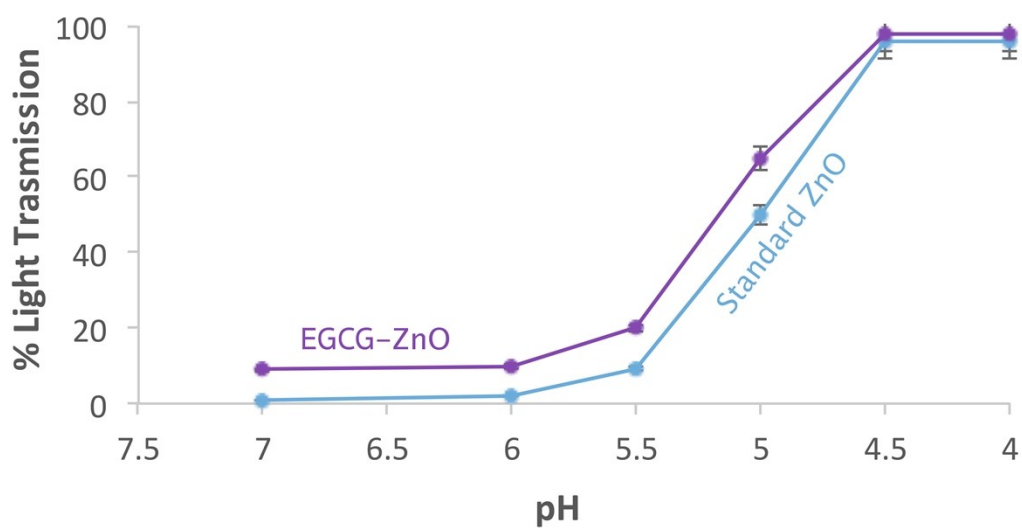

**Figure S4.** Degree of OTE-ZnO particle solubilization at various pH conditions in comparison to the standard ZnO, as monitored through the percentages of light transmission.

**Table S1.** Hydrodynamic sizes and zeta potential values of EGCG-ZnO and standard ZnO particles in water.

|              | Hydrodynamic sizes (nm) | Zeta potential (mV) |
|--------------|-------------------------|---------------------|
| EGCG-ZnO     | 409.5 ± 9.2             | -20.03 ± 0.23       |
| Standard ZnO | 297.5 ± 4.5             | -25.00 ± 1.74       |

**Table S2.** IC<sub>50</sub> values of EGCG-ZnO and standard ZnO particles in normal (WI-38) and cancer (PC-3) cells.

| Cell types | Concentrations that causes 50% cell mortality |                 |                        |                 |
|------------|-----------------------------------------------|-----------------|------------------------|-----------------|
|            | EGCG-ZnO particles                            |                 | Standard ZnO particles |                 |
|            | ZnO<br>(µg/mL)                                | EGCG<br>(µg/mL) | ZnO<br>(µg/mL)         | EGCG<br>(µg/mL) |
| Normal     | 19.0                                          | 0.170           | 18.5                   | -               |
| Cancer     | 10.0                                          | 0.090           | 17.5                   | -               |
